# Supplementary material for: A Noncanonical Autophagy Pathway Restricts Toxoplasma gondii Growth in a Strain-Specific Manner in IFN-γ-Activated Human Cells
Source: PubMed Central journal article supplement — mBio. 2015 Sep 8;6(5):e01157-15. doi: 10.1128/mBio.01157-15 (PMC4600106; doi:10.1128/mbio.01157-15), 2015-09-08
Supplement: mbo004152457sf2.pdf [file mbo004152457sf2.pdf]

Figure S2

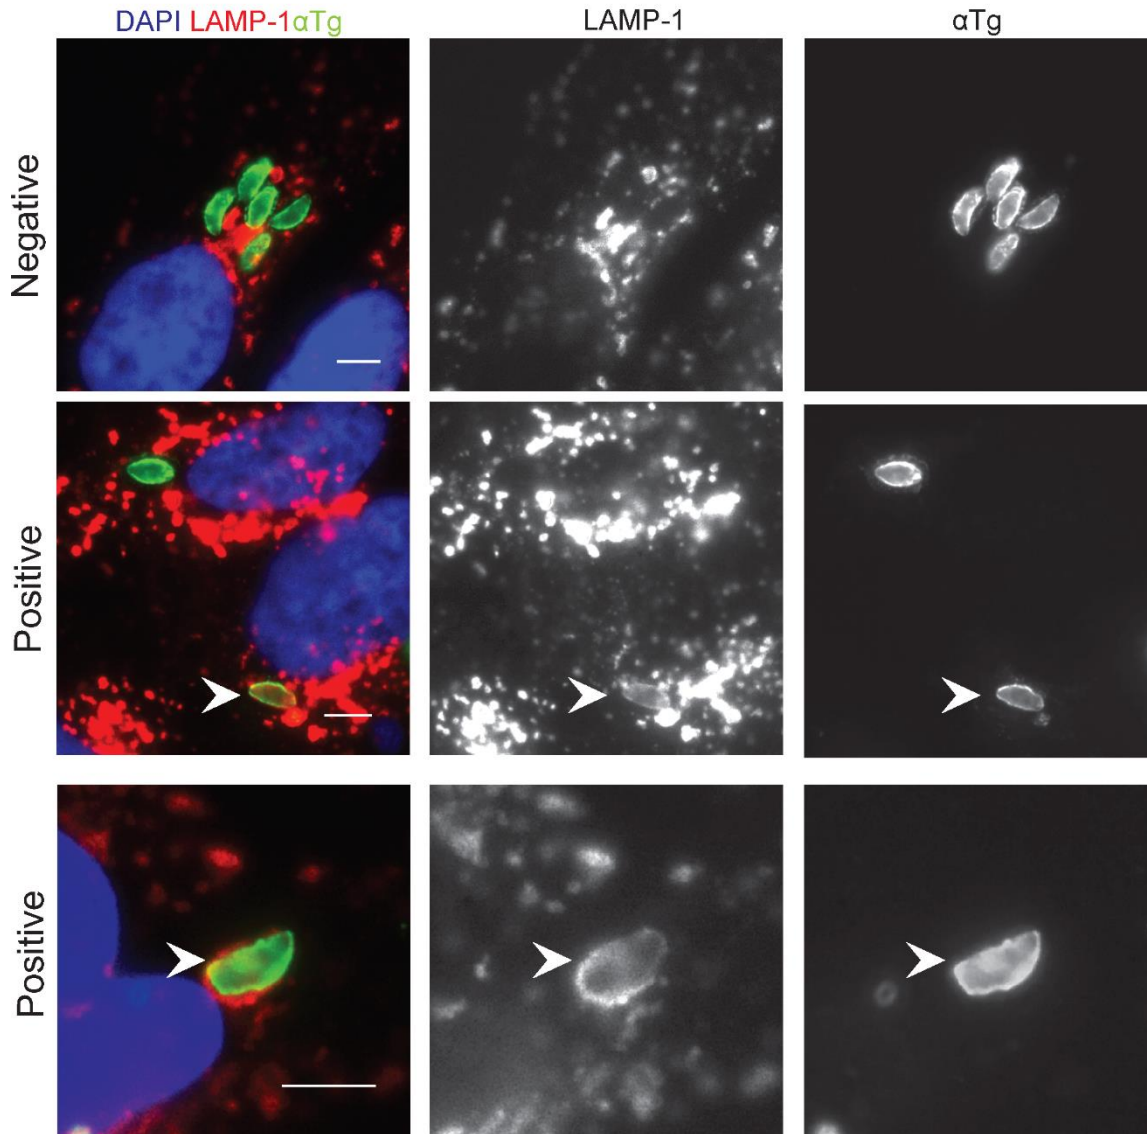

**FIG. S2. LAMP-1 localization by immunofluorescence in *T. gondii* infected HeLa cells. Related to FIG. 2**

Immunofluorescence images of type 3 (VEG) *T. gondii* in IFN $\gamma$ -activated HeLa cells at 6 hr post infection. Parasites were localized with mAb DG52 ( $\alpha$ Tg) to SAG1 followed by goat anti-mouse IgG conjugated to Alexa Fluor 488 (green). LAMP-1 was localized with a rabbit polyclonal antibody followed by goat anti-rabbit IgG conjugated to Alexa Fluor 594 (red). Arrowheads indicate positive rim of LAMP-1. Host nuclei were localized with DAPI. Scale bars = 5  $\mu$ m.
