# Supplementary material for: A Noncanonical Autophagy Pathway Restricts Toxoplasma gondii Growth in a Strain-Specific Manner in IFN-γ-Activated Human Cells
Source: PubMed Central journal article supplement — mBio. 2015 Sep 8;6(5):e01157-15. doi: 10.1128/mBio.01157-15 (PMC4600106; doi:10.1128/mbio.01157-15), 2015-09-08
Supplement: mbo004152457sf3.pdf [file mbo004152457sf3.pdf]

Figure S3

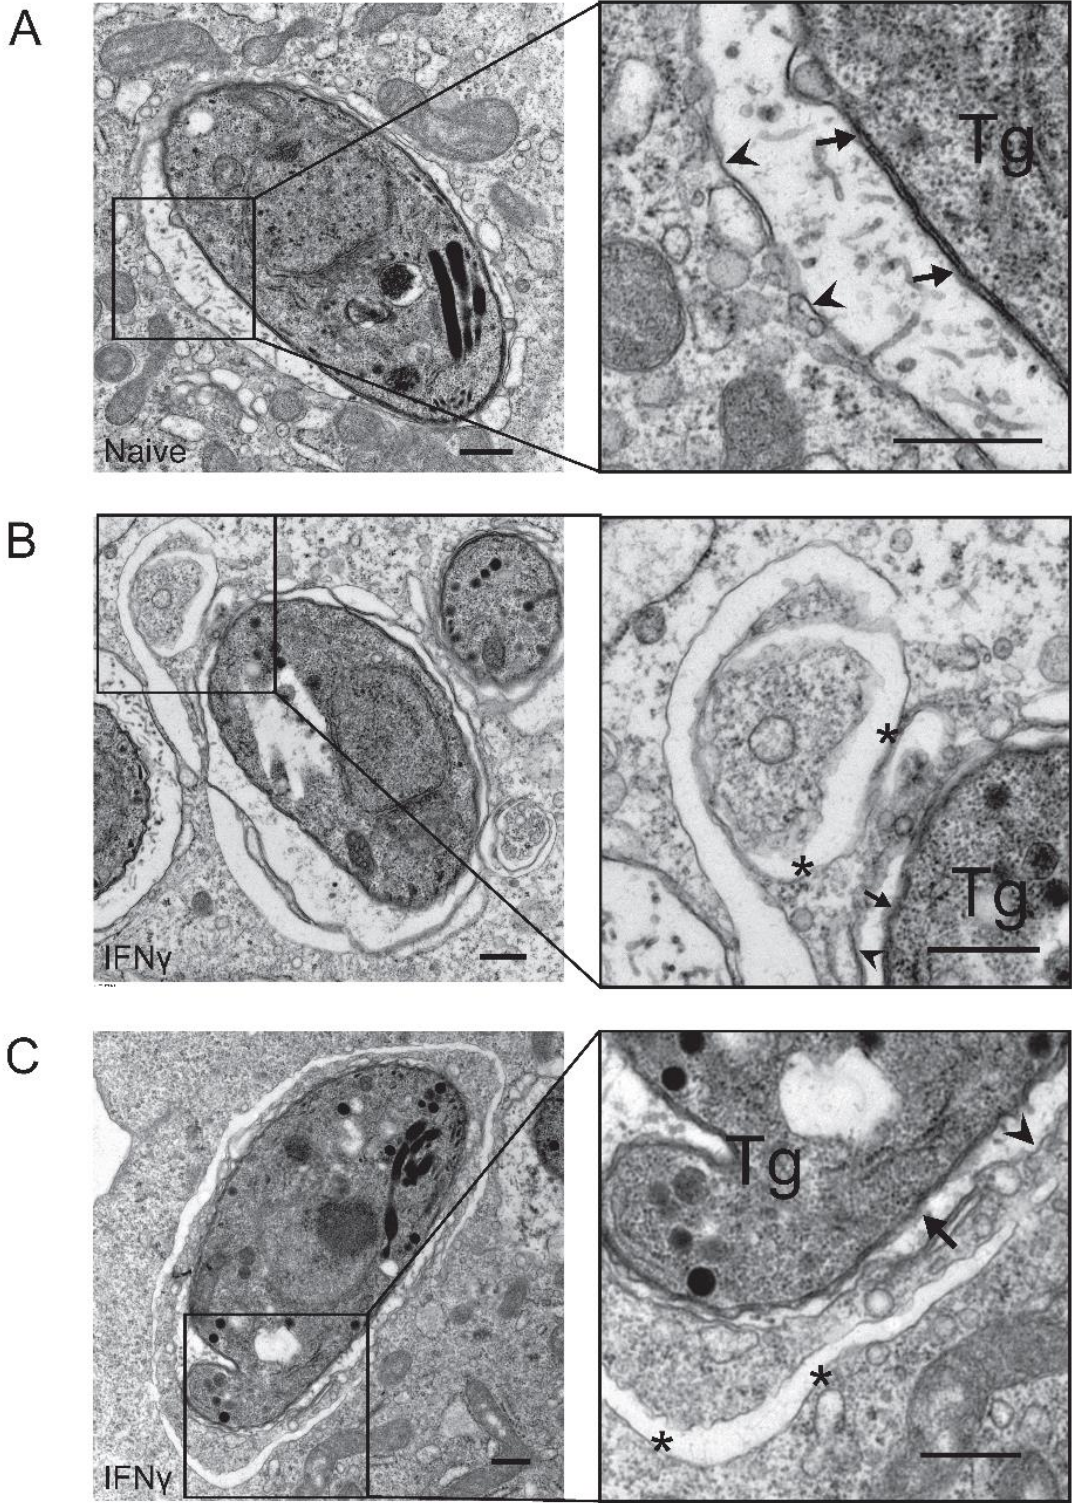

**FIG. S3. PVs were enclosed in multiple membranes in IFN $\gamma$ -activated cells. Related to FIG. 3**

A) Transmission electron microscopy reveals the normal architecture of the PVM of a type 3 (VEG) parasite in a naïve HeLa cell at 6 hr post infection. B) C) Additional membranes surround the PVM of a type 3 (VEG) parasite in HeLa cells activated with 5 ng/ml of IFN $\gamma$  at 6 hr post infection. Arrow indicates parasite membrane, arrowhead indicates PVM, asterix indicates additional membranes. Scale bars = 500 nm.
