# Supplementary material for: A Noncanonical Autophagy Pathway Restricts Toxoplasma gondii Growth in a Strain-Specific Manner in IFN-γ-Activated Human Cells
Source: PubMed Central journal article supplement — mBio. 2015 Sep 8;6(5):e01157-15. doi: 10.1128/mBio.01157-15 (PMC4600106; doi:10.1128/mbio.01157-15), 2015-09-08
Supplement: mbo004152457sf4.pdf [file mbo004152457sf4.pdf]

Figure S4

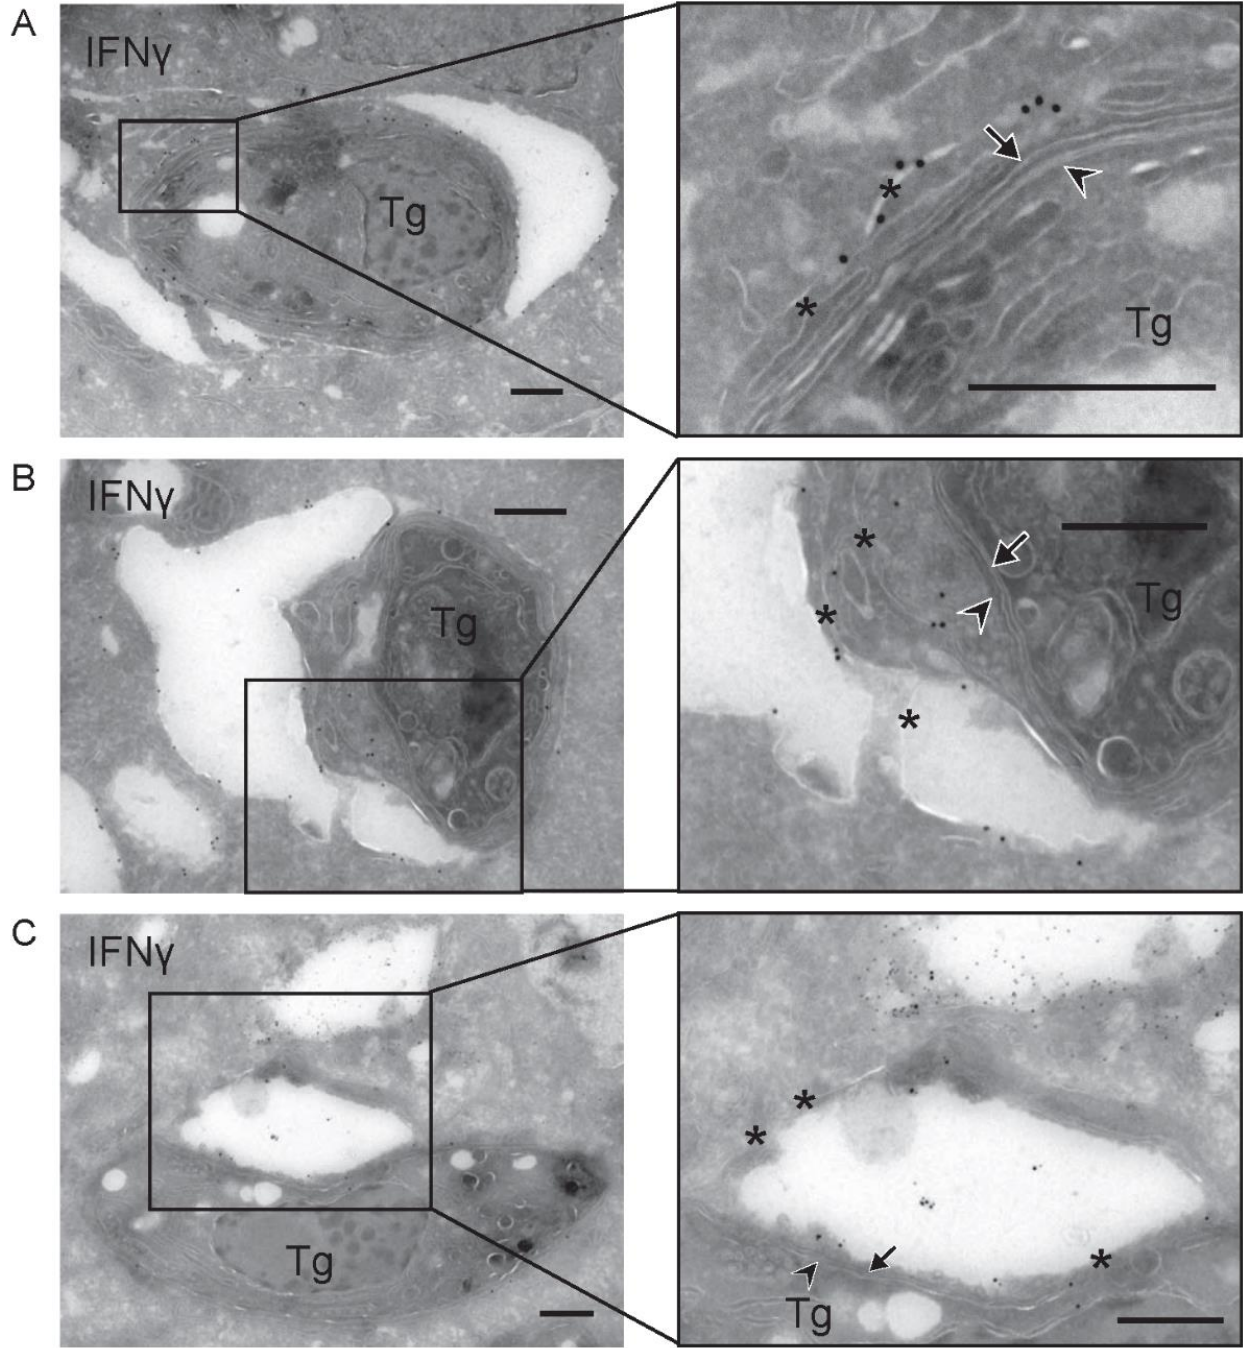

**FIG. S4. LC3 and LAMP-1 localization in cells infected with type 3 *T. gondii*.**  
Related to FIG. 4.

Cryo-immuno-EM localization of GFP-LC3 and LAMP-1 in IFN- $\gamma$ -activated (A,B,C) HeLa cells (5 ng/ml) infected with type 3 (VEG) parasites at 6 hr post infection. (A,B) GFP-LC3 was localized with a rabbit polyclonal antibody to GFP followed by goat anti-rabbit IgG conjugated to 18 nm gold. (C) LAMP-1 was localized with rabbit mAb D2D11 followed by donkey anti-rabbit IgG conjugated to 18 nm gold, GFP-LC3 was localized with a goat polyclonal antibody to GFP followed by donkey anti-goat IgG conjugated to 12nm gold. Arrowhead indicates parasite membrane, arrow indicates PVM, asterix indicates additional membranes. Scale bars = 500 nm.
