# Supplementary material for: A Noncanonical Autophagy Pathway Restricts Toxoplasma gondii Growth in a Strain-Specific Manner in IFN-γ-Activated Human Cells
Source: PubMed Central journal article supplement — mBio. 2015 Sep 8;6(5):e01157-15. doi: 10.1128/mBio.01157-15 (PMC4600106; doi:10.1128/mbio.01157-15), 2015-09-08
Supplement: mbo004152457sf5.pdf [file mbo004152457sf5.pdf]

Figure S5

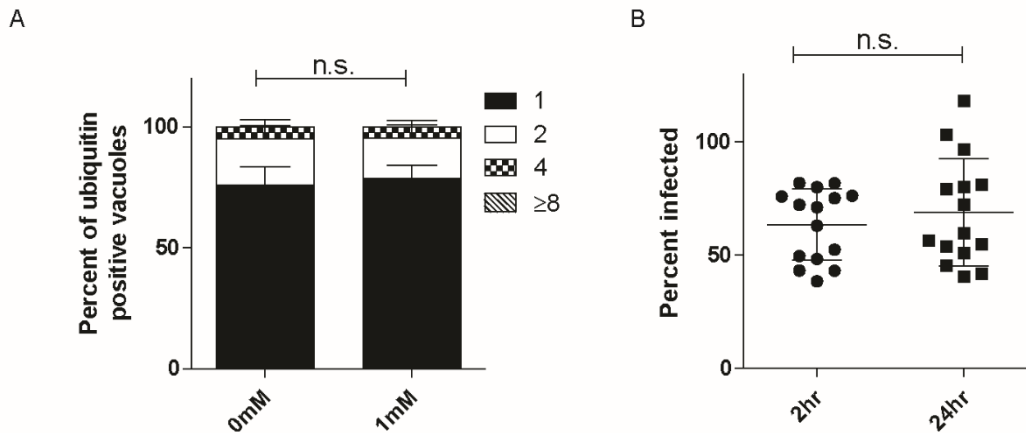

**FIG. S5. Replication of ubiquitin-positive PVs after tryptophan supplementation and survival of type 3 *T. gondii* in IFN $\gamma$ -activated cells. Related to FIG. 5**

A) Replication of type 3 (VEG) *T. gondii* in ubiquitin-positive PVs in IFN $\gamma$ -activated (5 ng/ml) HeLa cells supplemented with 0 or 1mM L-Tryptophan at 24 hr post infection. Parasites were localized with a rabbit polyclonal antibody to tachyzoites followed by goat anti-rabbit IgG conjugated to Alexa Fluor 488. Ubiquitin was localized with the mAb FK2 followed by anti-goat IgG conjugated to Alexa Fluor 594. N = 2 experiments. Mean  $\pm$  SD. (n.s. = not significant, 2-way ANOVA). B) Parasite clearance assay of type 3 (VEG) *T. gondii* in IFN $\gamma$ -activated (5 ng/ml) HeLa cells. Percent infected cells were determined by immunofluorescence assay at 2 hr and 24 hr post infection by the ratio of host cell nuclei to *T. gondii* per field. Parasites were localized with a rabbit polyclonal antibody to tachyzoites followed by goat anti-rabbit IgG conjugated to Alexa Fluor 488. Host cell nuclei were localized with DAPI. N = 3 coverslips. Mean  $\pm$  SD. (n.s. = not significant, Mann-Whitney Test).
